# Supplementary material
Source: PubMed Central journal article supplement (PMC4246261)
Supplement: pnas.1418204111.sapp.pdf [file pnas.1418204111.sapp.pdf]

# Supporting Information

Gao et al.

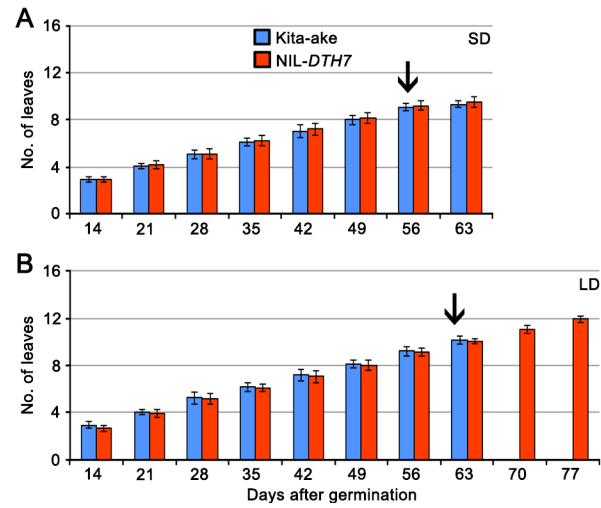

**Fig. S1.** NIL (*DTH7*) plants have the same leaf emergence rate as Kita-ake under controlled short day (A) and long day (B) conditions. Arrows indicate the flowering time of Kita-ake plants. Values are shown as mean  $\pm$  s.d. ( $n=8$ ).

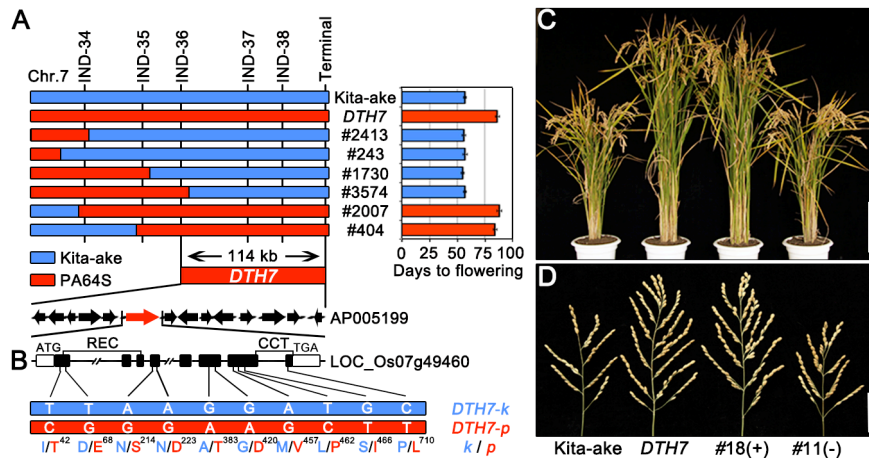

**Fig. S2.** Map-based cloning of *DTH7*. (A) Delimitation of *DTH7*. Blue and red bars indicate the Kita-ake chromosomes and PA64S genomic fragment, respectively. 14 genes were annotated in the region. (B) Structure and allelic variation of *DTH7*. Lines, black and white boxes represent introns, exons and untranslated regions, respectively. (C) and (D) Complementation test of *DTH7*. Mature plants (C) and panicles (D) of WT (Kita-ake), *DTH7* and two T1 transgenic lines, #18 (transgene-positive) and #11(transgene-negative) are shown. All plants were grown under E3. Scale bars in (C) and (D) are 20 cm and 4 cm, respectively.

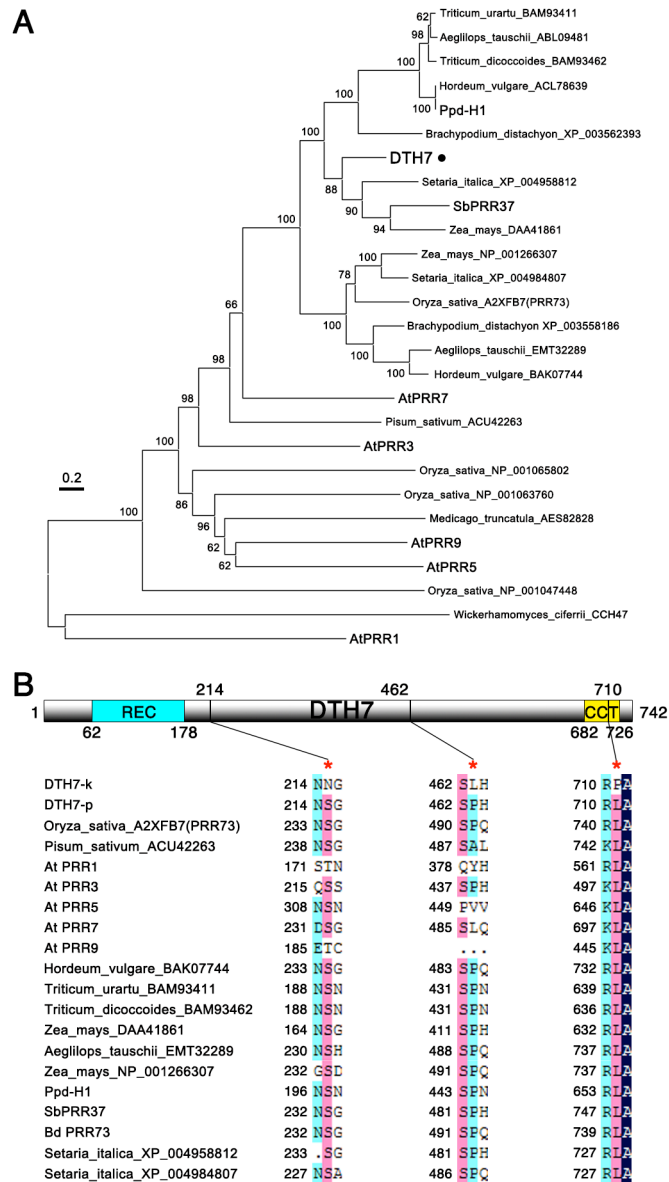

**Fig. S3.** (A) A phylogenetic tree of the DTH7-like proteins in higher plants. Amino acid sequences of 28 DTH7 homologs were obtained from NCBI (<http://www.ncbi.nlm.nih.gov/>) and used to construct a bootstrap N-J phylogenetic tree. 1,000 replicates were conducted to determine the statistical support for each node. DTH7 was denoted with a black dot. (B) A diagram showing that DTH7-k has three amino acid substitutions at the conserve positions across the DTH7-like proteins.

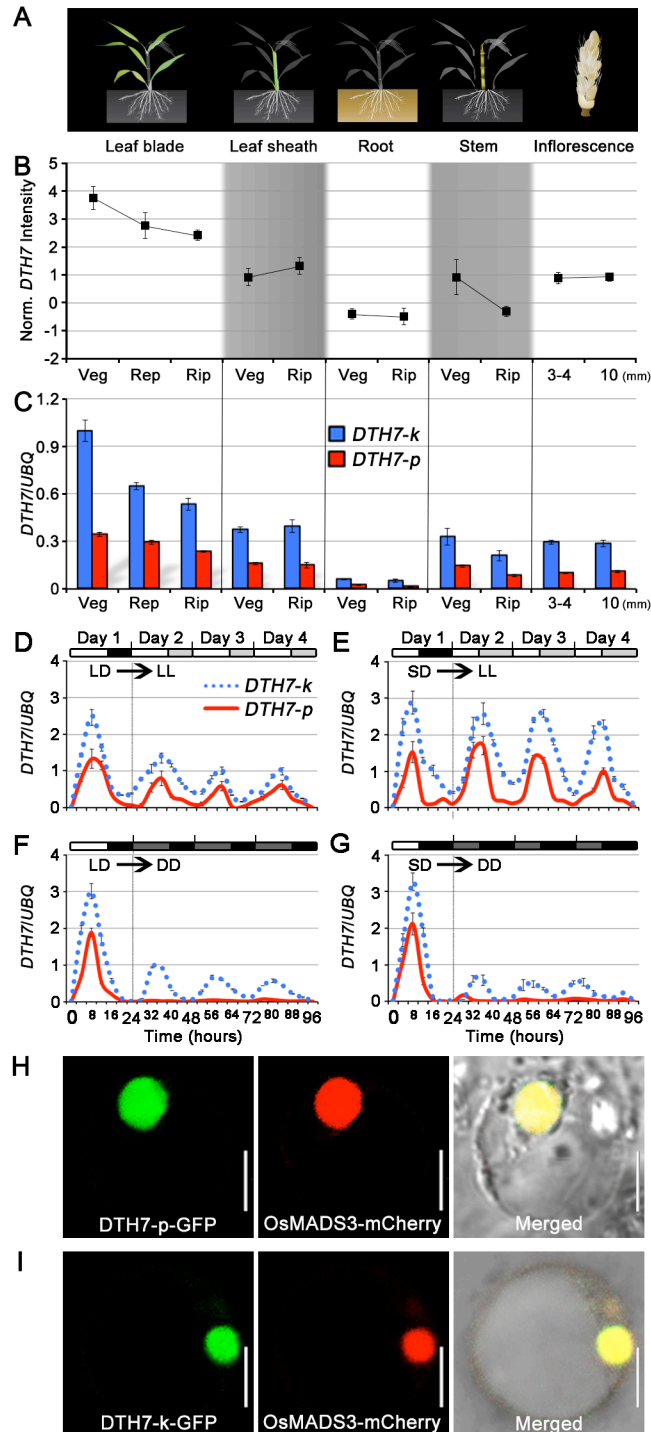

**Fig. S4.** Spatial and temporal expression of *DTH7*, and its protein sub-cellular localization. Measurement of *DTH7* transcript levels by microarray and qRT-PCR in various organs. (A) Pictures of the various organs. (B) Microarray data; (C) qRT-PCR data. (A) and (B) were cited from RiceXPro(31)(<http://ricexpro.dna.affrc.go.jp>). (D) and (E) qRT-PCR analysis of diurnal expression patterns of *DTH7*-k and *DTH7*-p alleles from LD (D) or SD (E) to LL (D) and DD (F) conditions. (F) and (G)

qRT-PCR analysis of diurnal expression patterns of *DTH7-k* and *DTH7-p* alleles from LD (F) or SD (G) to DD conditions. The white and black bars represent light and dark periods, respectively. The dark gray bars indicate subjective light during DD conditions; the light gray bars indicate subjective dark during LL conditions. The rice *Ubiquitin-1* (UBQ) gene was used as the internal control. The data are mean  $\pm$  standard deviations of three independent amplifications and two biological replicates. Fluorescence microscopic images showing that DTH7-p-GFP(H) and DTH7-k-GFP(I) fusion proteins were co-localized with the nuclear marker MADS3-mCherry fusion protein in rice protoplasts. Scale bars, 7.5  $\mu$ m.

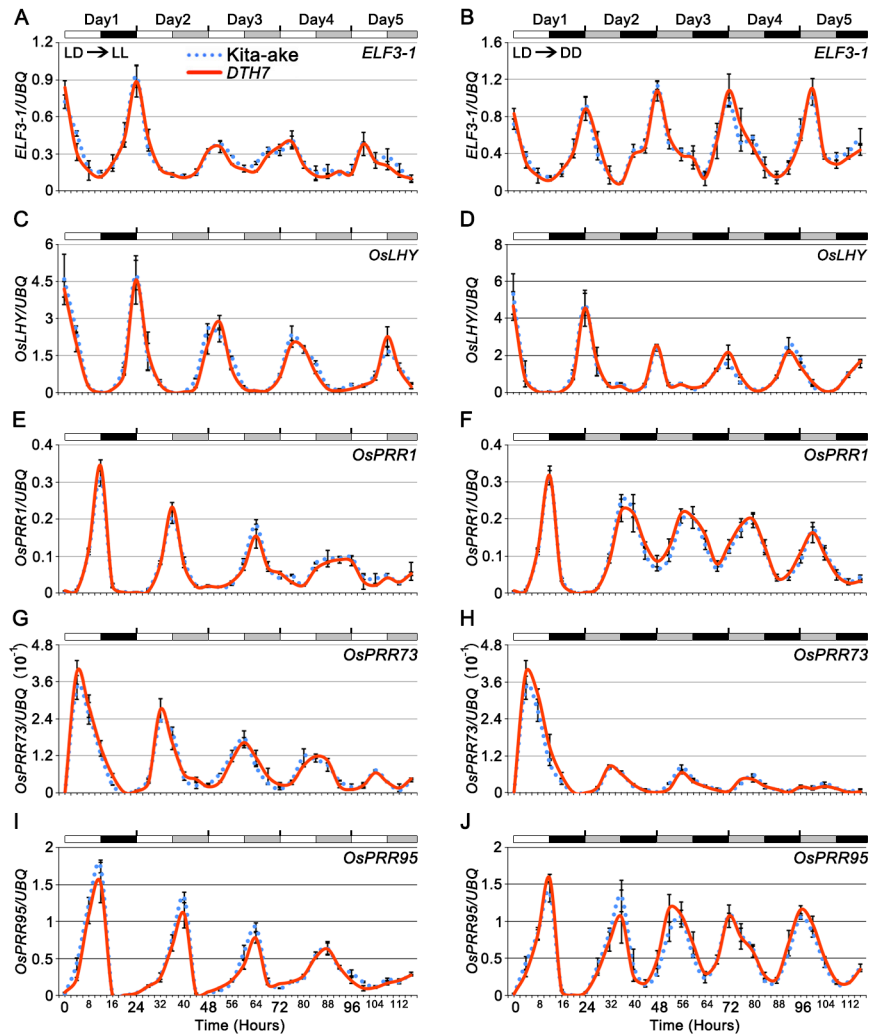

**Fig. S5.** Circadian expression of clock-associated genes in Kita-ake and *DTH7* plants. Transcript levels of *ELF3-1* (A and B), *OsLHY* (C and D), *OsPRR1* (E and F), *OsPRR73* (G and H), and *OsPRR95* (I and J) were examined under LL and DD conditions. The plants were first grown to cycles of 12-hour light/12-hour darkness for 28 days at 28°C and then transferred to the continuous light (LL) or continuous darkness (DD) at dawn. The white and black bars represent light and dark periods, respectively. The dark gray bars indicate subjective light during DD conditions; the light gray bars indicate subjective dark during LL conditions. The rice *Ubiquitin-1* (*UBQ*) gene was used as the internal control. The data are mean  $\pm$  standard deviations of three independent amplifications and two biological replicates.

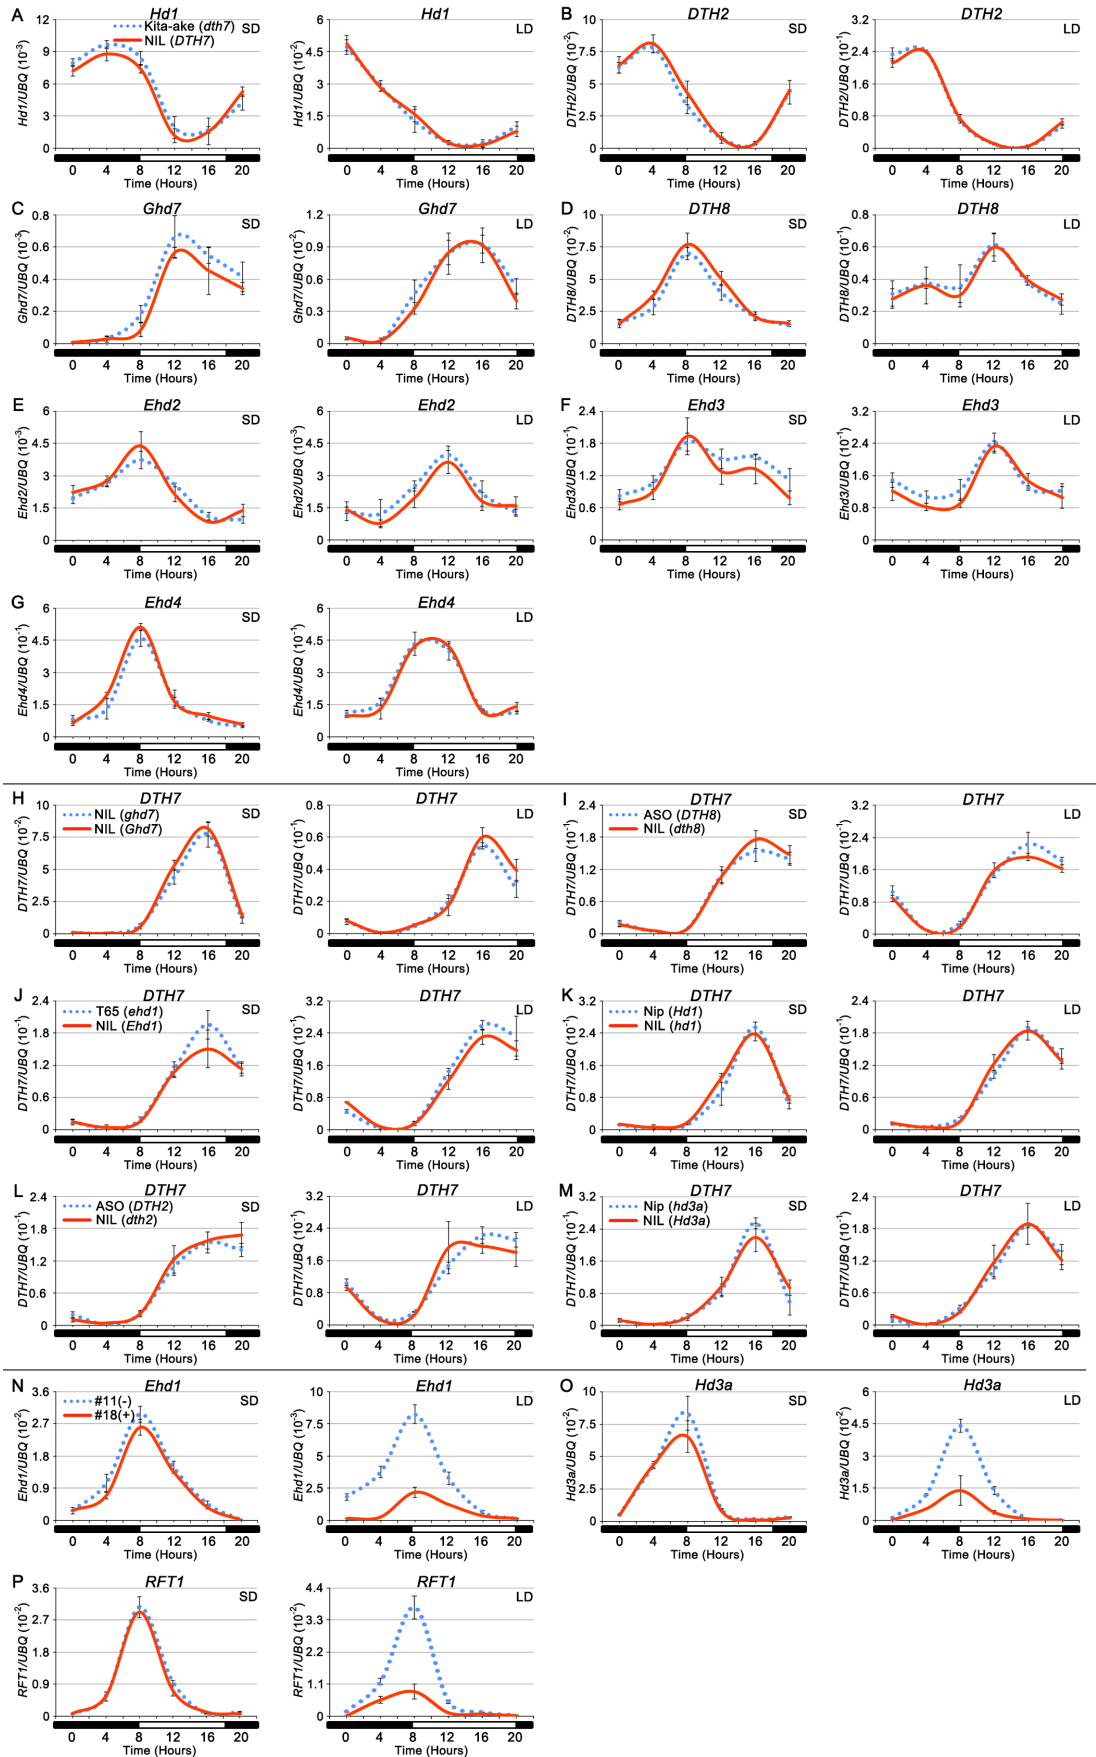

**Fig. S6.** qRT-PCR analysis of representative flowering-related genes in Kita-ake and *DTH7* plants, and *DTH7* in various flowering-time mutants or their NILs and corresponding WTs under SDs and LDs. Transcript levels of *Hd1* (A), *DTH2* (B), *Ghd7* (C), *DTH8* (D), *Ehd2* (E), *Ehd3* (F) and *Ehd4* (G), were examined in Kita-ake and *DTH7* plants, and the transcript level of *DTH7* was examined in *Ghd7* (H), *DTH8* (I), *Ehd1* (J), *Hd1* (K), *DTH2* (L) and *Hd3a* (M) NILs, and corresponding WTs. For comparison, the following accessions and their NILs were used: Nipponbare carrying a partially functional *Hd3a* allele and a NIL carrying a functional *Hd3a* allele; Taichun 65 carrying a non-functional *Ehd1* allele and a NIL carrying a functional *Ehd1* allele; Nipponbare carrying a functional *Hd1* allele and a NIL carrying a non-functional *Hd1* allele; Asominori carrying a functional *DTH2* allele and a NIL carrying a non-functional *DTH2* allele; A NIL carrying a functional *Ghd7* allele and a NIL carrying a non-functional *Ghd7* allele in the Shanyou 63 background; Asominori carrying a functional *DTH8* allele and a NIL carrying a non-functional *DTH8* allele. Transcript levels of *Ehd1* (N), *Hd3a* (O) and *RFT1* (P) were also examined in *DTH7* transgenic positive (#18 (+)) and negative (#11 (-)) lines. The rice *Ubiquitin-1* (*UBQ*) gene was used as the internal control. The data are mean  $\pm$  standard deviations of three independent amplifications and two biological replicates.



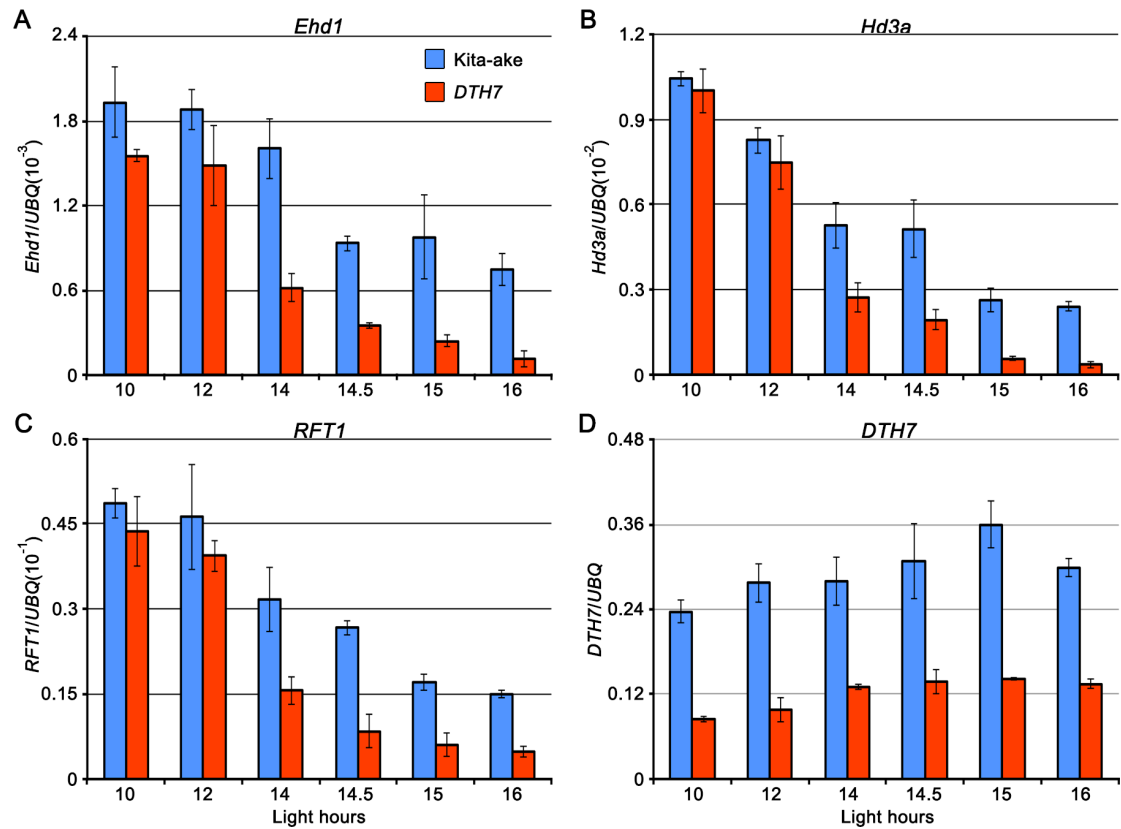

**Fig. S7.** qRT-PCR analysis of *Ehd1* (A), *Hd3a* (B), *RFT1*(C) and *DTH7* (d) under various photoperiod conditions. Penultimate leaves were harvested around the reported peak expression time points for each gene during the 24 hrs photoperiod – at dawn for *Ehd1*, *Hd3a* and *RFT1*, 8 h after dawn for *DTH7* from 28 d-old (SDs) and 35 d-old (LDs) plants. The rice *Ubiquitin-1* (*UBQ*) gene was used as the internal control. The data are mean  $\pm$  standard deviations of three independent amplifications and two biological replicates.

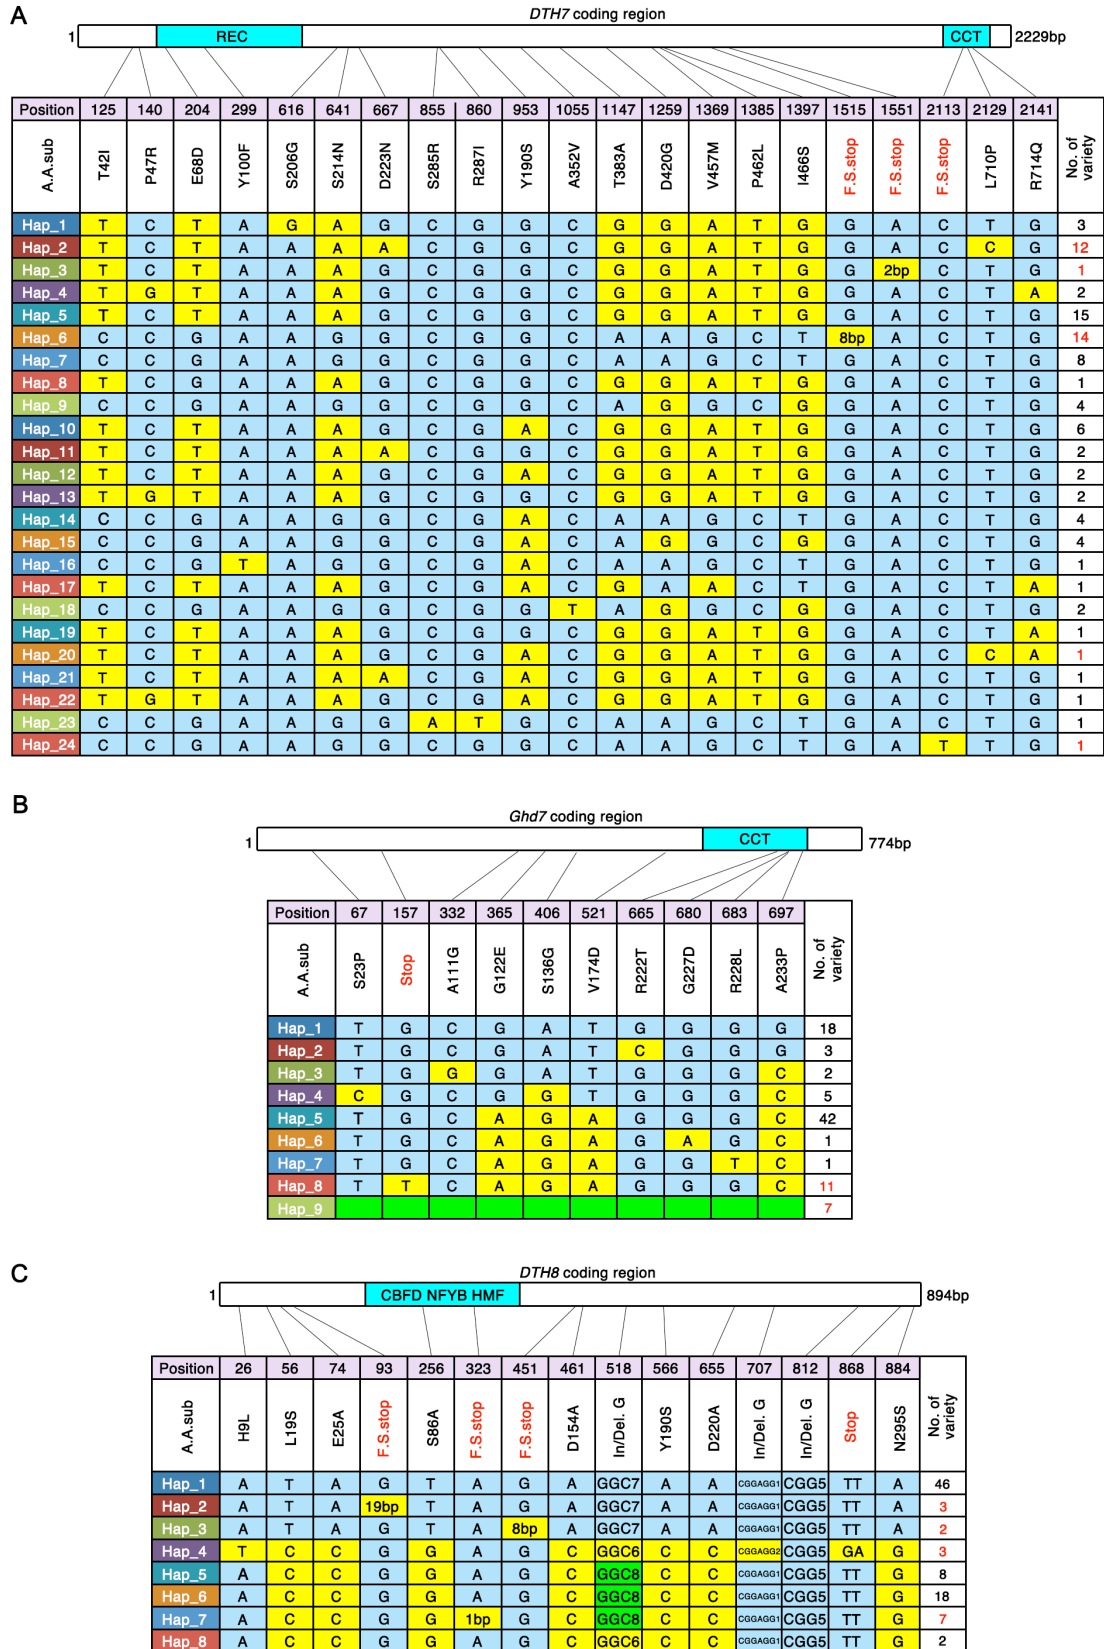

**Fig. S8.** Haplotype analysis of *DTH7*, *Ghd7* and *DTH8* coding sequences. (A) The *DTH7* nucleotide sequences of the accessions in the core collection were compared

with that of cv. PA64s (Hap\_7). Polymorphic nucleotides are indicated by different colors. Deletion and insertion sites are indicated by open and closed arrowheads, respectively. The number of accessions with each haplotype (Hap\_1-24) is shown in the column at the right, with the numbers for loss-of-function types in red. F.S., frame shift. PA64S type (Hap\_7, functional), Nipponbare type (Hap\_13), Chimaio type (Hap\_5), Yajiaoshu 1 type (Hap\_8) and Haolai type (Hap\_9) and loss-of-function allelic of Kita-ake type (Hap\_2), Baimaodao type (Hap\_3), Lucaihao type (Hap\_6), SHADA BORO type (Hap\_20) and Kasalash type (Hap\_24) were used for the ANOVA analysis (SI Appendix: Table S1). (B) The *Ghd7* nucleotide sequences of the accessions in the core collection were compared with that of cv. MH63 (Hap\_1). Polymorphic nucleotides are indicated by different colors. The number of accessions with each haplotype (Hap\_1-9) is shown in the column at the right, with the numbers for loss-of-function types in red. Hap\_9 is *Ghd7* deletion type. F.S., frame shift. Functional haplotypes of MH63 type (Hap\_1) and Nipponbare type (Hap\_5) and loss-of-function haplotypes of Kita-ake type (Hap\_8) and ZS97 type (Hap\_9)<sup>5</sup> were used for the ANOVA analysis (SI Appendix: Table S1). (C) The *DTH8* nucleotide sequences of the accessions in the core collection were compared with that of cv. Asominori (Hap\_1). Polymorphic nucleotides are indicated by different colors. The number of accessions with each haplotype (Hap\_1-9) is shown in the column at the right, with the numbers for loss-of-function types in red. Asominori type (Hap\_1, functional), IR24 type (Hap\_7, non-functional), ZS97 type (Hap\_4), Yangeng 15 type (Hap\_2) and Longtepu B type (Hap\_3)<sup>6</sup> were used for the ANOVA analysis (Table S1).

**Table S1.** Summary of the *DTH7*, *Ghd7* and *DTH8* allele types in modern cultivar of a rice germplasm core collection.

| Variety Name        | Subpop. | Accession No. | Hainan (E1) | Nanjing (E2) | Beijing (E3) | Haerbin (E4) | <i>DTH7</i> | <i>Ghd7</i> | <i>DTH8</i> | Hainan (E1) | Nanjing (E2) | Beijing (E3) | Haerbin (E4) | Origin       | PS index |
|---------------------|---------|---------------|-------------|--------------|--------------|--------------|-------------|-------------|-------------|-------------|--------------|--------------|--------------|--------------|----------|
| <b>I</b>            |         |               |             |              |              |              |             |             |             |             |              |              |              |              |          |
| Guangtoughulu       | TEJ     | 07-00004      | 45.39       | 47.83        | 48.53        | 77.80        | Hap2        | Hap8        | Hap2        | n.d.        | n.d.         | 92.00        | 104.11       | China        | 0.065    |
| Zaoyouzhuan         | IND     | 15-02740      | 59.58       | 68.65        | 78.87        | 102.00       | Hap6        | Hap9        | Hap4        | 89.29       | 137.40       | 133.80       | 117.56       | China        | 0.245    |
| Zhuqing             | IND     | N/A           | 53.70       | 56.60        | 59.56        | 92.50        | Hap6        | Hap9        | Hap7        | n.d.        | n.d.         | 186.43       | n.d.         | China        | 0.098    |
| Longtepu B          | IND     | N/A           | 67.60       | 79.10        | 89.88        | 96.70        | Hap6        | Hap9        | Hap3        | n.d.        | n.d.         | 217.86       | n.d.         | China        | 0.248    |
| Zhenshan 97B        | IND     | N/A           | 62.50       | 68.70        | 73.38        | 102.40       | Hap6        | Hap9        | Hap7        | n.d.        | n.d.         | 183.71       | n.d.         | China        | 0.148    |
| Zaoxian 14          | IND     | N/A           | 59.60       | 62.10        | 63.44        | 93.40        | Hap6        | Hap9        | Hap7        | n.d.        | n.d.         | 197.14       | n.d.         | China        | 0.061    |
| Yangeng 15          | TEJ     | ZD-02337      | 47.80       | 49.00        | 49.19        | 83.50        | Hap2        | Hap8        | Hap2        | n.d.        | n.d.         | 81.64        | n.d.         | China        | 0.028    |
| Fangzhu             | TEJ     | WD-11028      | 46.34       | 48.10        | 49.19        | 79.20        | Hap2        | Hap8        | Hap2        | n.d.        | n.d.         | 101.36       | n.d.         | Japan        | 0.058    |
| Yuenanzaodao        | IND     | WD-11661      | 62.69       | 66.03        | 69.10        | 99.30        | Hap6        | Hap9        | Hap7        | n.d.        | n.d.         | 131.09       | n.d.         | Vietnam      | 0.093    |
| <b>II</b>           |         |               |             |              |              |              |             |             |             |             |              |              |              |              |          |
| Kita-ake            | TEJ     | N/A           | 53.65       | 55.13        | 59.27        | 73.31        | Hap2        | Hap8        | Hap1        | 33.35       | 43.87        | 66.73        | 78.59        | Japan        | 0.095    |
| Hejiang 19          | TEJ     | N/A           | 55.50       | 56.10        | 58.20        | 88.30        | Hap2        | Hap8        | Hap1        | n.d.        | n.d.         | 77.64        | n.d.         | China        | 0.048    |
| Kongyu1 31          | TEJ     | ZD-05454      | 56.10       | 57.30        | 58.70        | 89.10        | Hap2        | Hap8        | Hap1        | n.d.        | n.d.         | 73.73        | n.d.         | China        | 0.044    |
| Hejiang 21          | TEJ     | ZD-02375      | 52.59       | 55.67        | 57.76        | 85.50        | Hap2        | Hap8        | Hap1        | n.d.        | n.d.         | 86.18        | n.d.         | China        | 0.09     |
| Fushiguang          | TEJ     | ZD-05468      | 58.34       | 62.30        | 66.95        | 92.60        | Hap2        | Hap8        | Hap1        | n.d.        | n.d.         | 83.27        | n.d.         | Japan        | 0.129    |
| Shangyu 397         | TEJ     | WD-16547      | 56.36       | 60.58        | 63.86        | 85.30        | Hap2        | Hap8        | Hap1        | n.d.        | n.d.         | 94.18        | n.d.         | Japan        | 0.112    |
| Xiongji 12          | TEJ     | WD-104562     | 58.38       | 64.79        | 69.29        | 105.50       | Hap2        | Hap8        | Hap1        | n.d.        | n.d.         | 112.09       | n.d.         | North Korean | 0.157    |
| Hongguo             | TEJ     | 07-00002      | 53.97       | 61.09        | 63.93        | 85.87        | Hap2        | Hap8        | Hap1        | n.d.        | 108.60       | 119.40       | 164.56       | China        | 0.156    |
| Quqianbai           | IND     | 11-00389      | 69.97       | 72.39        | 85.13        | 108.53       | Hap6        | Hap1        | Hap7        | n.d.        | 177.60       | 212.00       | 186.33       | China        | 0.178    |
| <b>III</b>          |         |               |             |              |              |              |             |             |             |             |              |              |              |              |          |
| Xingguo             | TEJ     | 06-00035      | 55.09       | 81.52        | 83.33        | 95.93        | Hap2        | Hap5        | Hap1        | n.d.        | 165.60       | 174.60       | 132.33       | China        | 0.339    |
| Kasalath            | IND     | N/A           | 68.53       | 76.50        | 85.30        | 99.53        | Hap24       | Hap1        | Hap5        | n.d.        | n.d.         | 246.43       | n.d.         | India        | 0.197    |
| SHADA BORO          | TRJ     | 8839          | 81.70       | 87.83        | 96.07        | 113.53       | Hap20       | Hap5        | Hap5        | 52.80       | 211.60       | 126.40       | 70.67        | Bangladesh   | 0.15     |
| Baimaodao           | TEJ     | 07-00109      | 72.42       | 76.26        | 87.67        | 114.60       | Hap3        | Hap5        | Hap5        | n.d.        | 165.00       | 188.00       | 155.22       | China        | 0.174    |
| PA64S               | IND     | N/A           | 85.63       | 90.53        | 108.76       | n.d.         | Hap7        | Hap5        | Hap7        | n.d.        | n.d.         | 241.00       | n.d.         | China        | 0.213    |
| <b>IV</b>           |         |               |             |              |              |              |             |             |             |             |              |              |              |              |          |
| Yelicanghua         | TEJ     | 02-00295      | 57.48       | 71.39        | 94.67        | 140.80       | Hap5        | Hap5        | Hap1        | n.d.        | 176.40       | 188.80       | 134.41       | China        | 0.393    |
| Zhonglou 1 hao      | TEJ     | 04-00115      | 49.42       | 60.65        | 82.47        | 99.53        | Hap5        | Hap5        | Hap1        | n.d.        | 146.40       | 203.40       | 118.49       | China        | 0.401    |
| Weiguo              | TEJ     | 05-00024      | 67.58       | 75.13        | 93.53        | 113.67       | Hap5        | Hap5        | Hap1        | n.d.        | 163.80       | 224.00       | 134.03       | China        | 0.278    |
| Chimao              | TEJ     | 06-00010      | 43.91       | 47.96        | 50.73        | 92.00        | Hap5        | Hap5        | Hap1        | n.d.        | n.d.         | 119.60       | 162.00       | China        | 0.135    |
| Nipponbare          | TEJ     | WD-10576      | 62.48       | 76.91        | 110.53       | 160.00       | Hap13       | Hap5        | Hap1        | n.d.        | 129.40       | 169.60       | n.d.         | Japan        | 0.435    |
| T65                 | TEJ     | 30-00205      | 86.06       | 90.26        | 97.13        | 119.47       | Hap5        | Hap5        | Hap1        | n.d.        | 136.60       | 161.80       | 129.00       | taiwan       | 0.114    |
| Zhouandao           | TEJ     | WD-18718      | 61.27       | 74.70        | 89.73        | 104.93       | Hap5        | Hap5        | Hap1        | n.d.        | 168.60       | 182.20       | 127.00       | Korea        | 0.317    |
| Huadongdao          | TEJ     | WD-19115      | 69.82       | 79.78        | 93.53        | 108.27       | Hap5        | Hap5        | Hap1        | n.d.        | 217.20       | 193.40       | 139.67       | Korea        | 0.254    |
| Jingyue 1 hao       | TEJ     | ZD-00881      | 64.42       | 74.09        | 101.93       | 134.87       | Hap13       | Hap5        | Hap1        | n.d.        | 192.20       | 286.00       | 188.00       | China        | 0.368    |
| Zhendao 88          | TEJ     | ZD-05531      | 67.58       | 85.61        | 118.47       | 160.00       | Hap5        | Hap5        | Hap1        | 88.20       | 197.20       | 159.00       | n.d.         | China        | 0.43     |
| Xishen 15           | TRJ     | 15-04286      | 71.33       | 86.96        | 117.13       | 160.00       | Hap7        | Hap5        | Hap1        | 117.45      | 89.80        | 107.80       | n.d.         | China        | 0.391    |
| Lengshuinnuo        | TRJ     | 21-01989      | 137.27      | 153.20       | 160.00       | 160.00       | Hap5        | Hap5        | Hap1        | 236.88      | n.d.         | n.d.         | n.d.         | China        | n.d.     |
| Yuyannuo            | TRJ     | 21-02235      | 112.94      | 131.50       | 160.00       | 160.00       | Hap5        | Hap5        | Hap1        | 172.37      | n.d.         | n.d.         | n.d.         | China        | n.d.     |
| Haolai              | IND     | 21-02824      | 108.24      | 147.20       | 156.00       | 160.00       | Hap9        | Hap1        | Hap1        | 53.46       | n.d.         | n.d.         | n.d.         | China        | 0.306    |
| Jiuyuehuang         | TRJ     | 24-00173      | 75.61       | 85.61        | 116.53       | 160.00       | Hap5        | Hap5        | Hap1        | n.d.        | 144.60       | 132.20       | n.d.         | China        | 0.351    |
| Gaojiaozhengdao     | TRJ     | 09-00972      | 75.39       | 106.74       | 110.93       | 160.00       | Hap5        | Hap5        | Hap1        | 136.23      | 205.60       | 221.80       | n.d.         | China        | 0.32     |
| Tiegangwu           | TRJ     | 10-00463      | 93.82       | 116.13       | 160.00       | 160.00       | Hap5        | Hap5        | Hap1        | 101.87      | n.d.         | n.d.         | n.d.         | China        | n.d.     |
| Feidongtangdao      | TEJ     | 11-00529      | 51.21       | 87.26        | 126.73       | 160.00       | Hap5        | Hap5        | Hap1        | n.d.        | 153.40       | 233.60       | n.d.         | China        | 0.56     |
| Yajiaoshu 1         | TRJ     | 13-00940      | 116.94      | 160.00       | 160.00       | 160.00       | Hap8        | Hap5        | Hap1        | n.d.        | n.d.         | n.d.         | n.d.         | China        | n.d.     |
| <b>Unclassified</b> |         |               |             |              |              |              |             |             |             |             |              |              |              |              |          |
| JC92                | IND     | 67171         | 90.42       | 101.04       | 110.47       | 160.00       | Hap14       | Hap1        | Hap8        | n.d.        | 224.60       | 201.00       | n.d.         | India        | 0.182    |
| TD25                | IND     | 68407         | 139.52      | 160.00       | 160.00       | 160.00       | Hap7        | Hap1        | Hap6        | 86.60       | n.d.         | n.d.         | n.d.         | Thailand     | n.d.     |
| RTS13               | IND     | 8234          | 142.42      | 160.00       | 160.00       | 160.00       | Hap15       | Hap1        | Hap6        | 164.00      | n.d.         | n.d.         | n.d.         | Vietnam      | n.d.     |
| Tam Cau-10A         | IND     | 8228          | 86.18       | 160.00       | 160.00       | 160.00       | Hap16       | Hap1        | Hap6        | n.d.        | n.d.         | n.d.         | n.d.         | Vietnam      | n.d.     |
| DV85                | AUS     | 5207          | 85.03       | 96.70        | 99.67        | 116.00       | Hap17       | Hap5        | Hap5        | n.d.        | 143.00       | 141.80       | 94.67        | Bangladesh   | 0.147    |
| Dhala Shaita        | AUS     | 8388          | 76.82       | 82.26        | 91.53        | 120.33       | Hap14       | Hap5        | Hap5        | n.d.        | 275.40       | 269.40       | 243.00       | Bangladesh   | 0.161    |
| T1                  | AUS     | 9479          | 82.70       | 86.04        | 96.07        | 115.40       | Hap18       | Hap5        | Hap6        | n.d.        | 225.40       | 213.40       | 180.67       | India        | 0.14     |
| BJ1                 | AUS     | 12333         | 82.15       | 96.61        | 96.53        | 121.40       | Hap19       | Hap5        | Hap5        | n.d.        | 152.40       | 320.60       | 120.33       | India        | 0.149    |
| DV1                 | AUS     | 8803          | 82.85       | 85.13        | 96.13        | 110.93       | Hap7        | Hap5        | Hap5        | 48.60       | 217.60       | 259.20       | 180.33       | Bangladesh   | 0.138    |
| SAMPONG P9          | AUS     | 23218         | 160.00      | 160.00       | 160.00       | 160.00       | Hap15       | Hap1        | Hap6        | n.d.        | n.d.         | n.d.         | n.d.         | Cambodia     | n.d.     |
| Firooz              | ARO     | 10315         | 93.24       | 130.20       | 133.53       | 160.00       | Hap14       | Hap1        | Hap6        | 60.80       | n.d.         | 193.40       | n.d.         | Iran         | 0.302    |
| Dom Sofid           | ARO     | 17616         | 80.76       | 91.17        | 102.27       | 121.53       | Hap18       | Hap5        | Hap5        | 77.40       | 192.80       | 358.80       | 276.67       | Iran         | 0.21     |
| JC1                 | ARO     | 68399         | 160.00      | 160.00       | 160.00       | 160.00       | Hap7        | Hap1        | Hap6        | 327.20      | n.d.         | n.d.         | n.d.         | India        | n.d.     |
| Mansaku             | TEJ     | 13338         | 75.36       | 76.39        | 90.13        | 106.80       | Hap21       | Hap5        | Hap1        | n.d.        | 247.60       | 295.80       | 164.67       | Japan        | 0.164    |
| Geumobyeko          | TEJ     | 15020         | 69.48       | 73.43        | 92.53        | 108.27       | Hap10       | Hap5        | Hap1        | n.d.        | 156.20       | 178.00       | 145.67       | Korea        | 0.249    |
| Koshihikari         | TEJ     | 20526         | 68.67       | 83.48        | 101.73       | 136.13       | Hap22       | Hap5        | Hap1        | n.d.        | n.d.         | 180.40       | 117.33       | Japan        | 0.325    |
| Tainan Iku 487      | TEJ     | 9110          | 88.94       | 91.30        | 99.67        | 122.07       | Hap10       | Hap4        | Hap1        | n.d.        | 159.80       | 202.40       | 136.67       | taiwan       | 0.108    |
| Dholi Boro          | TRJ     | 13736         | 82.12       | 86.91        | 94.13        | 111.00       | Hap4        | Hap5        | Hap5        | n.d.        | 192.40       | 211.20       | 134.33       | Bangladesh   | 0.128    |
| N 22                | TRJ     | 25750         | 73.64       | 84.52        | 96.73        | 114.67       | Hap23       | Hap5        | Hap6        | n.d.        | 167.20       | 197.00       | 166.33       | India        | 0.239    |
| Taidonggludao       | TEJ     | 30-00195      | 72.24       | 79.48        | 94.73        | 111.67       | Hap10       | Hap5        | Hap1        | n.d.        | 181.20       | 205.20       | 129.56       | taiwan       | 0.2379   |
| Fengjing            | TEJ     | WD-10954      | 63.48       | 72.83        | 93.53        | 116.27       | Hap11       | Hap5        | Hap1        | n.d.        | 161.20       | 192.40       | 168.33       | Japan        | 0.3219   |
| Qiuguang            | TEJ     | WD-10974      | 61.73       | 76.61        | 89.07        | 105.67       | Hap10       | Hap5        | Hap1        | n.d.        | 136.00       | 181.40       | 110.44       | Japan        | 0.307    |
| Yiwetdao            | TEJ     | WD-19087      | 64.33       | 76.70        | 102.73       | 133.13       | Hap10       | Hap5        | Hap1        | n.d.        | 170.20       | 211.20       | 165.78       | Korea        | 0.374    |
| Fenshouguang        | TEJ     | WD-19876      | 66.36       | 70.35        | 87.53        | 111.00       | Hap12       | Hap5        | Hap1        | n.d.        | 199.00       | 225.60       | 168.00       | Japan        | 0.242    |
| zhonghua 11         | TEJ     | ZD-03874      | 58.79       | 73.96        | 103.07       | 135.60       | Hap12       | Hap5        | Hap1        | 111.40      | 257.00       | 311.60       | 197.67       | China        | 0.43     |
| Taduan              | IND     | 5215          | 77.48       | 92.17        | 107.33       | 160.00       | Hap10       | Hap1        | Hap6        | n.d.        | 255.00       | n.d.         | n.d.         | Philippines  | 0.279    |
| Khao Dawk Mali 105  | AUS     | 31899         | 106.76      | 160.00       | 160.00       | 160.00       | Hap7        | Hap1        | Hap6        | n.d.        | n.d.         | n.d.         | n.d.         | Thailand     | n.d.     |
| Patnai 23           | IND     | 61690         | 160.00      | 160.00       | 160.00       | 160.00       | Hap14       | Hap1        | Hap6        | n.d.        | n.d.         | n.d.         | n.d.         | India        | n.d.     |
| CO 18               | IND     | 67068         | 110.00      | 149.30       | 160.00       | 160.00       | Hap7        | Hap1        | Hap6        | n.d.        | n.d.         | n.d.         | n.d.         | India        | n.d.     |
| Gie 57              | IND     | 67148         | 108.70      | 160.00       | 160.00       | 160.00       | Hap15       | Hap1        | Hap8        | n.d.        | n.d.         | n.d.         | n.d.         | Vietnam      | n.d.     |
| Qiyuexian           | IND     | 16-06887      | 57.03       | 136.70       | 160.00       | 160.00       | Hap9        | Hap4        | Hap6        | n.d.        | n.d.         | n.d.         | n.d.         | China        | n.d.     |
| Wenxiangnuo         | IND     | 21-00272      | 69.58       | 135.80       | 160.00       | 160.00       | Hap9        | Hap1        | Hap6        | n.d.        | n.d.         | n.d.         | n.d.         | China        | n.d.</   |

**Table S2.** Primers used in this study.

| Primer name                                                      | Primer sequence (5'-3')                           | Description                               |
|------------------------------------------------------------------|---------------------------------------------------|-------------------------------------------|
| Primers used for map-based cloning and marker-assisted selection |                                                   |                                           |
| IND-34-F                                                         | GGACAGAATGTGAAGACAGTCG                            | Indel                                     |
| IND-34-R                                                         | ACTAATCCACCAACGCATCC                              |                                           |
| IND-35-F                                                         | TGCAGCTGCGCCACAGCCATAG                            | Indel                                     |
| IND-35-R                                                         | CAACCACGACACCGCCGTGTTG                            |                                           |
| IND-36-F                                                         | AGTTTGCGCCACACATATCA                              | Indel                                     |
| IND-36-R                                                         | TCACGACAATTGGACTGAGC                              |                                           |
| IND-37-F                                                         | TGGAGAATTCAGGGAAAGGA                              | Indel                                     |
| IND-37-R                                                         | CAGGCAGGTCAGAATCACATT                             |                                           |
| IND-38-F                                                         | TGGAGGCTTTCTCGCTTTC                               | Indel                                     |
| IND-38-R                                                         | GAGGAAGTCGAGGATGAGGA                              |                                           |
| Primers used for transgenic construction                         |                                                   |                                           |
| <i>pDTH7::DTH7-F</i>                                             | CCATGATTACGAATTCCACAAGGTTAGCACATGATGTCG           | <i>pDTH7::DTH7</i><br>complementati<br>on |
| pDTH7-DTH7-R                                                     | CCAAGCTTGCATGCCTGCAGTCCTTTCGCTTCCAGAACA<br>TACATT |                                           |
| Primers used for subcellular localization                        |                                                   |                                           |
| DTH7-GFP-F                                                       | GCCCAGATCAACTAGTATGATGGGAACCGCTCATCAC             | DTH7-GFP<br>fusion                        |
| DTH7-GFP-R                                                       | TCGAGACGTCTCTAGATCTGTCCGCTGCCGCTTCG               |                                           |
| Primers used for quantitative RT-PCR                             |                                                   |                                           |
| Ehd4-F                                                           | CAGCCAGCGGAATCATCAC                               | Reference 3                               |
| Ehd4-R                                                           | CCAAATCCATCAGACCTACTCCT                           |                                           |
| Ehd2-F                                                           | CGACGACAATAGCTCGATCGC                             | Reference 3                               |
| Ehd2-R                                                           | GTGCATGGTCACGGAGCCTT                              |                                           |
| Ehd3-F                                                           | GACCACCTCGTCACCTACAAG                             | Reference 3                               |
| Ehd3-R                                                           | GAGTGTCCCTCCAGCTAATCC                             |                                           |
| Hd1-F                                                            | TCAGCAACAGCATATCTTTCTCATCA                        | Reference 3                               |
| Hd1-R                                                            | TCTGGAATTTGGCATATCTATCACC                         |                                           |

|           |                            |              |
|-----------|----------------------------|--------------|
| Ehd1-F    | CCTACAGTGATTATGGCTTCA      | Reference 3  |
| Ehd1-R    | GTGCTGCCAAATGTTGCTC        |              |
| Hd3a-F    | GCTCACTATCATCATCCAGCATG    | Reference 3  |
| Hd3a-R    | CCTTGCTCAGCTATTTAATTGCATAA |              |
| RFT1-F    | TGACCTAGATTCAAAGTCTAATCCTT | Reference 3  |
| RFT1-R    | TGCCGGCCATGTCAAATTAATAAC   |              |
| DTH8-F    | CAGGAGTGCCTGTCGGAGTT       | Reference 6  |
| DTH8-R    | GGTCGTCGCCGTTGATGGT        |              |
| Ghd7-F    | GCTTGAACCCAAACACGG         | Reference 6  |
| Ghd7-R    | CTCATCTCGGCATAGGCTT        |              |
| UBQ-F     | ACCCTGGCTGACTACAACATC      | Reference 3  |
| UBQ-R     | AGTTGACAGCCCTAGGGTG        |              |
| PhyB-F    | CTCATCTTCAAGGAATCTGAGG     | This study   |
| PhyB-R    | CCTGCTAGAACAAGCATTAC       |              |
| DTH7-F    | GAACCTATGGCAGCATGTGT       | This study   |
| DTH7-R    | CGTCATTGCTGCCATTGTT        |              |
| DTH2-F    | CCAGTTTCAACGACGCCTAA       | Reference 4  |
| DTH2-R    | GTCTCCATATACGCTCCCATCA     |              |
| OsPRR1-F  | CAAACGTTGCTCCCTCAGTA       | This study   |
| OsPRR1-R  | GAATGCTCATACCAGCAGGA       |              |
| OsPRR73-F | AGGAGCGGAAAGAAACATAA       | Reference 32 |
| OsPRR73-R | AACCTTGGAGGAGCAATCAG       |              |
| OsPRR95-F | CGCTCAGTGGCAGTGTCTGT       | Reference 32 |
| OsPRR95-R | GGTATCGCACCTTCTTCTCA       |              |
| OsLHY-F   | CAGATAAGGCCGACACCAAAC      | Reference 32 |
| OsLHY-R   | GGTGTGTTGGAACCACATG        |              |
| OsELF3-1F | TGTCGCCCTTCGTCAA           | Reference 32 |
| OsELF3-1R | GGTCTTTTCCCAGCTCATT        |              |
